# Supplementary material for: Hospitalisation in the last month of life and in-hospital death of nursing home residents: a cross-sectional analysis of six European countries
Source: HighWire-hosted journal article supplement (doi:10.1136/bmjopen-2020-047086), 2021-08-01
Supplement: bmjopen-2020-047086supp001_data_supplement.pdf [file bmjopen-2020-047086supp001_data_supplement.pdf]

## Appendix

Table A1. Hospitalizations and in-hospital deaths by nursing home type for each country

|                    |                                                | HOSPITALIZATION  | IN-HOSPITAL DEATH |
|--------------------|------------------------------------------------|------------------|-------------------|
| Country            | Type of nursing home                           | Yes<br>Count (%) | Yes<br>Count (%)  |
| <b>Belgium</b>     | Type 2: On-site nurses and off-site physicians | 68 (25.8%)       | 48 (17.5%)        |
| <b>Finland</b>     | Type 2: On-site nurses and off-site physicians | 57 (22.0%)       | 24 (9.1%)         |
| <b>Italy</b>       | On-site physicians and nurses                  | 8 (16.7%)        | 11 (23.9%)        |
|                    | On-site nurses and off-site physicians         | 12 (9.1%)        | 14 (10%)          |
| <b>Netherlands</b> | On-site physicians and nurses                  | 10 (8.7%)        | 3 (2.8%)          |
|                    | On-site nurses and off-site physicians         | 24 (26.4%)       | 9 (10.8%)         |
| <b>Poland</b>      | On-site physicians and nurses                  | 28 (18.8%)       | 12 (6.5%)         |
|                    | On-site nurses and off-site physicians         | 38 (33.3%)       | 48 (38.1%)        |
| <b>England</b>     | On-site nurses and off-site physicians         | 6 (13.3%)        | 7 (14.6%)         |
|                    | Off-site physicians and nurses                 | 14 (34.1%)       | 9 (23.1%)         |
| <b>Total</b>       | On-site physicians and nurses                  | 46 (14.7%)       | 26 (7.7%)         |
|                    | On-site nurses and off-site physicians         | 205 (22.7%)      | 150 (16%)         |
|                    | Off-site physicians and nurses                 | 14 (34.1%)       | 9 (23.1%)         |

We only included residents for whom a questionnaire was filled in by a nurse (total N = 1384)

All variables are calculated at the level of the resident

|| Reported by administrator/manager of nursing home. For 44 out of 1384 residents no questionnaire was returned by the nursing home administrator.
